# Supplementary material for: SILAC-Based Quantification of TGFBR2-Regulated Protein Expression in Extracellular Vesicles of Microsatellite Unstable Colorectal Cancers
Source: PubMed Central journal article supplement (PMC6747473; doi:10.3390/ijms20174162), 2019-08-26
Supplement: ijms-20-04162-s001.pdf [file ijms-20-04162-s001.pdf]

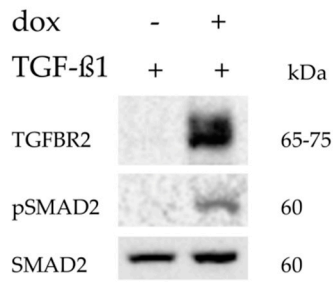

**Supplementary Figure S1.** Doxycycline-induced reconstitution of TGFBR2 expression and downstream signaling. Western blot analysis demonstrated dox-induced reconstituted expression of TGFBR2 and phosphorylation of SMAD2 (pSMAD2) in protein lysates of HCT116-TGFBR2 cells. Total SMAD2 protein was used as a loading control. Protein sizes are indicated. .

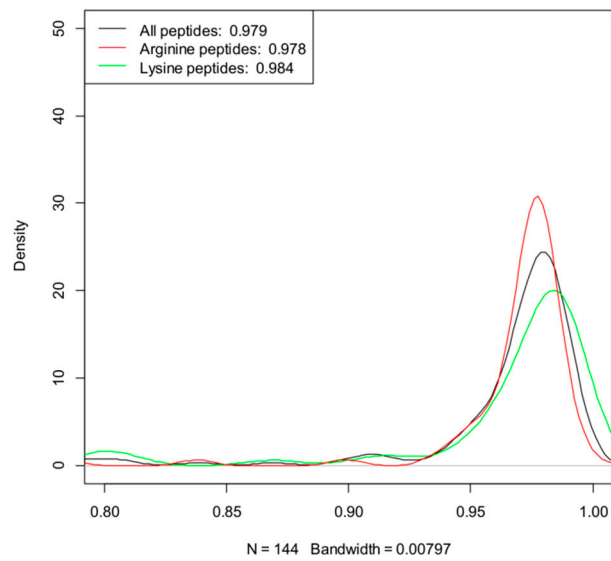

**Supplementary Figure S2** Incorporation of heavy-labeled amino acids in EVs isolated from TGFBR2-proficient HCT116-TGFBR2 cells. Incorporation efficiency of heavy-labeled amino acids was calculated based on 144 identified peptides.

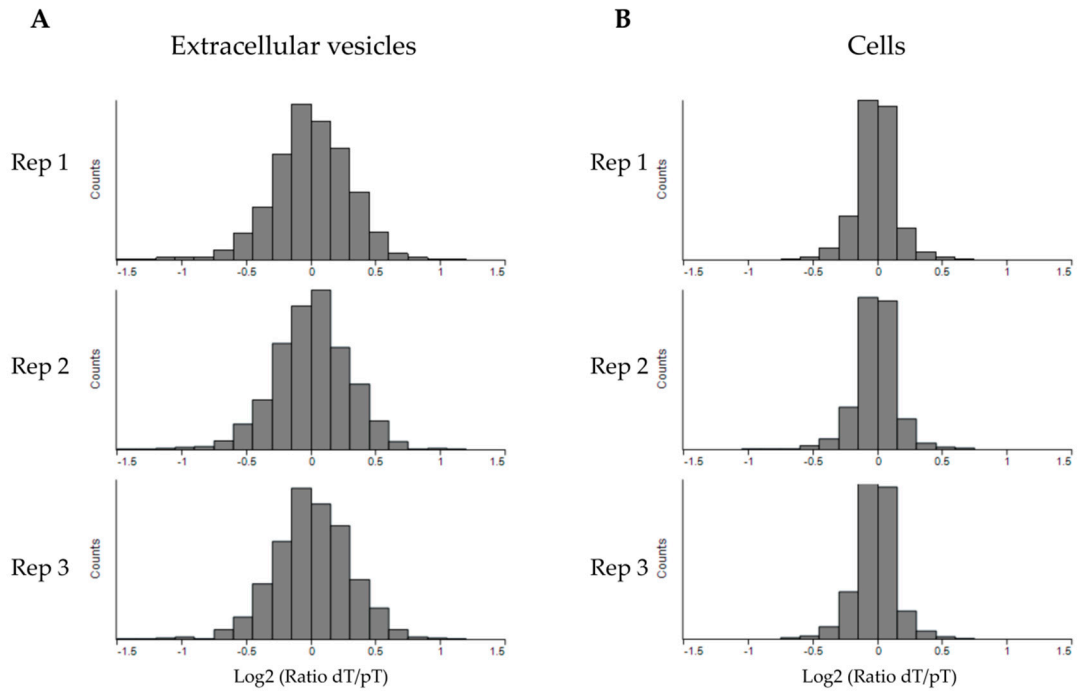

**Supplementary Figure S3.** Distribution of quantified protein ratios. Histograms are shown for log<sub>2</sub>-transformed protein ratios (dT/pT) from each biological replicate of EVs (A) and cells (B).

**Supplementary Table S1** TGFBR2-regulated proteins in cells.

| Gene names                                                  | Protein names                          | Protein ratio <sup>1</sup><br>(dT/pT) | Peptides<br>(unique) | Coverage (%) | Identification score |
|-------------------------------------------------------------|----------------------------------------|---------------------------------------|----------------------|--------------|----------------------|
| <i>Upregulated cellular proteins by TGFBR2 deficiency</i>   |                                        |                                       |                      |              |                      |
| NUMA1                                                       | Nuclear mitotic apparatus protein 1    | 2.23                                  | 12 (12)              | 8.3          | 36.38                |
| CAD                                                         | CAD protein                            | 1.91                                  | 20 (20)              | 13.1         | 85.112               |
| GLUL                                                        | Glutamine synthetase                   | 1.82                                  | 7 (7)                | 25.5         | 29.43                |
| UBE2Z                                                       | Ubiquitin-conjugating enzyme E2 Z      | 1.77                                  | 4 (4)                | 13.3         | 13.23                |
| TUBB4A                                                      | Tubulin beta-4A chain                  | 1.71                                  | 17 (17)              | 6.3          | 26.76                |
| EDC4                                                        | Enhancer of mRNA-decapping protein 4   | 1.56                                  | 7 (7)                | 9.0          | 27.22                |
| RANBP2                                                      | E3 SUMO-protein ligase RanBP2          | 1.51                                  | 6 (6)                | 3.4          | 20.66                |
| <i>Downregulated cellular proteins by TGFBR2 deficiency</i> |                                        |                                       |                      |              |                      |
| MGST3                                                       | Microsomal glutathione S-transferase 3 | 0.61                                  | 3 (3)                | 32.2         | 15.32                |

|       |                                                           |      |         |      |        |
|-------|-----------------------------------------------------------|------|---------|------|--------|
| KRT18 | Keratin, type I<br>cytoskeletal 18                        | 0.61 | 30 (19) | 77   | 323.31 |
| VDAC3 | Voltage-dependent<br>anion-selective channel<br>protein 3 | 0.63 | 9 (9)   | 41.7 | 63.09  |
| EMG1  | Ribosomal RNA small<br>subunit<br>methyltransferase NEP1  | 0.64 | 4 (4)   | 22.1 | 15.02  |
| KRT8  | Keratin, type II<br>cytoskeletal 8                        | 0.65 | 39 (31) | 64.2 | 323.31 |
| VDAC2 | Voltage-dependent<br>anion-selective channel<br>protein 2 | 0.66 | 13 (13) | 59.5 | 174.22 |
| HN1   | Hematological and<br>neurological expressed 1<br>protein  | 0.67 | 3 (3)   | 54.5 | 18.21  |

---

<sup>1</sup> Mean ratios calculated from three biological replicates.
